# Supplementary material for: Genome-Wide Identification, Comprehensive Gene Feature, Evolution, and Expression Analysis of Plant Metal Tolerance Proteins in Tobacco Under Heavy Metal Toxicity
Source: Front Genet. 2019 Apr 24;10:345. doi: 10.3389/fgene.2019.00345 (PMC6491887; doi:10.3389/fgene.2019.00345)
Supplement: Supplementary file 3 [file Table_3.xlsx]

## Sheet: Sheet1
Table S3 The sequence similarity of MTP proteins between N. tabacum and A. thaliana.
Query	AtMTP1	AtMTP2	AtMTP3	AtMTP4	AtMTP5	AtMTP6	AtMTP7	AtMTP8	AtMTP9	AtMTP10	AtMTP11	AtMTP12
sbjct	Identity(%)	Identity(%)	Identity(%)	Identity(%)	Identity(%)	Identity(%)	Identity(%)	Identity(%)	Identity(%)	Identity(%)	Identity(%)	Identity(%)
NtMTP1.1	61.64(94% Cover)	62.27(93% Cover)	64.16(83% Cover)	39.205	22.939	24.051	21.311	19.565	ND	ND	ND	25.344
NtMTP1.2	68.47(100% Cover)	59.69(99% Cover)	62.79(86% Cover)	39.364	26.446	23.333	21.311	19.565	ND	ND	ND	29.396
NtMTP4.1	45.283	44.54	44.063	52.786	22.561	38.71	20.886	58.824	ND	ND	ND	23.238
NtMTP4.2	45.553	45.533	46.11	52.212	21.667	38.71	19.872	41.379	ND	ND	ND	25.137
NtMTP5.1	26.446	21.474	20.615	21.166	69.393	22.785	35	ND	ND	ND	ND	33.824
NtMTP5.2	27.273	21.173	21.231	21.807	69.129	24.051	35	ND	ND	ND	ND	34.074
NtMTP6.1	40.741	37.5	38.889	30.263	21.649	55.482	28.205	22.118	21.29	21.29	21.406	25.301
NtMTP6.2	40.741	37.5	40.816	30.263	21.649	52.022	26.829	20.278	20.402	20.057	20.056	25.287
NtMTP7.1	21.212	23.913	22.353	ND	35	26.866	66.851	27.586	22.449	24.49	ND	ND
NtMTP7.2	21.212	42.105	23.636	ND	35	28.571	72.928	43.478	32.258	22.165	40	ND
NtMTP7.3	21.429	24.658	22.917	24.49	21.739	24.59	67.787	28.571	ND	36.364	ND	36.364
NtMTP8.1	ND	16.667	ND	23.636	19.626	20.906	ND	73.947	51.22	54.573	56.231	ND
NtMTP8.2	ND	17.073	ND	29.63	20.556	21.154	24.138	74.611	55.793	55.183	57.447	ND
NtMTP8.3	ND	ND	ND	29.63	ND	20.833	ND	66.015	57.5	56.74	57.009	ND
NtMTP8.4	ND	ND	ND	ND	ND	21.603	ND	63.947	62.825	48.303	50.289	ND
NtMTP8.5	ND	22.917	ND	23.404	ND	ND	ND	57.24(96% Cover)	60.57(59%Cover)	59.429	45.339	ND
NtMTP9.1	ND	ND	ND	ND	ND	20.557	ND	54.142	69.69(93% Cover)	74.12%(85% Cover)	60.27	30.952
NtMTP9.2	ND	ND	ND	ND	ND	23.448	ND	50	64.06(92% Cover)	66.67(85% Cover)	55.163	35.294
NtMTP10.1	ND	ND	ND	ND	ND	19.512	21.374	54.079	66.329	66.501	57.784	ND
NtMTP10.2	ND	ND	ND	ND	ND	ND	ND	41.141	55.643	56.693	49.02	25.714
NtMTP10.3	ND	21.818	ND	ND	ND	23.077	ND	49.56	65.99	68.267	56.098	31.429
NtMTP10.4	ND	24.528	ND	ND	ND	20.229	ND	53.42	69.081	72.384	58.284	31.429
NtMTP11.1	ND	28.177	ND	30	ND	19.863	ND	49.315	55.643	56.032	78.82	ND
NtMTP11.2	ND	29.282	ND	30	ND	20.134	ND	48.767	53.58	56.3	78.552	ND
NtMTP12.1	33.333	ND	27.473	30.645	30.159	23.469	ND	ND	23.158	26.19	ND	73.006
NtMTP12.2	24.194	ND	28.571	30.645	29.365	23.469	ND	ND	23.158	26.19	ND	73.171
Note: In the sequence alignment, each AtMTP protein sequence was used as the query sequence (shown in yellow), and all NtMTP protein sequences were used as the subject sequence (shown in green). The maximum value of identity and/or cover was shown in red. ND stands for E-vaule ≥ 5.
